# Supplementary material for: High Throughput Gene Expression Analysis Identifies Reliable Expression Markers of Human Corneal Endothelial Cells
Source: PLoS One. 2013 Jul 2;8(7):e67546. doi: 10.1371/journal.pone.0067546 (PMC3699644; doi:10.1371/journal.pone.0067546)
Supplement: Table S5 — TGF. List of components of the TGF pathway and their respective RPM values for young CEC-DM, old CEC-DM, CEC cultures and corneal stroma. This table is a subset of Table S1. (XLSX) [file pone.0067546.s005.xlsx]

## Sheet: Supplementary Table 5
Gene symbol	Young	Old	Culture	Stroma
TGFBI	610.86	605.799	439.787	3947.09
JUNB	198.834	555.62	49.2009	230.289
SMAD3	179.812	274.935	55.2431	38.289
TGFBR3	134.949	130.15	10.5739	43.8381
SMAD2	105.878	44.9514	82.0015	130.959
BAMBI	91.5213	84.1532	41.0008	2.21965
FOSL1	91.5213	105.061	2.58952	79.9074
JUN	89.3678	114.992	37.1165	48.2774
MAPK3	77.8828	154.194	44.6693	8.8786
FOXK2	68.5512	191.828	43.8061	72.1386
DCP1A	64.9622	30.8388	8.41595	22.1965
RIT1	62.4498	0	33.8796	13.8728
FOXC1	59.5786	113.424	24.3847	8.8786
TGFB3	50.9648	1.56807	11.8686	7.21386
SMURF1	48.4524	156.807	40.785	18.3121
FOXJ3	41.9921	19.3396	24.3847	16.6474
RHEB	37.6852	9.93113	26.5426	47.1676
FOXP4	35.1729	6.79498	3.4527	37.1791
MAPK9	34.0962	0.522691	5.61063	26.0809
TGFBR2	31.2249	7.31767	375.912	26.6358
FKBP2	30.1482	49.6556	69.4855	47.7225
FKBP1A	28.3537	7.31767	24.3847	23.8612
SMAD4	28.3537	11.4992	35.3901	0
FOXO1	24.7646	1.04538	0.647381	7.76877
SMAD5	23.329	0	3.02111	1.66474
JUND	22.97	59.5868	7.98436	19.4219
CREBBP	22.6111	55.9279	25.0321	2.21965
GDF15	21.5344	76.3129	4.31587	3.32947
HRAS	20.0988	13.59	24.8163	86.0114
KRAS	19.0221	17.2488	9.27912	0.554912
BMP1	18.6632	0	20.932	6.65895
ZFYVE9	18.6632	0.522691	0.215794	0.554912
TGFA	15.433	0.522691	0.215794	0.554912
ACVR1	15.0741	1.04538	108.76	3.88439
BMPR2	14.7152	51.2237	20.5004	1.10982
SNIP1	13.9974	7.31767	0.215794	81.5721
SMAD9	13.6385	0	0.215794	0
TGFB1I1	13.6385	1.04538	57.4011	33.2947
MAPK1	12.9207	2.61345	82.0015	47.7225
RRAS	12.5617	45.9968	97.5387	1.66474
FOXJ2	9.33158	13.0673	0	0.554912
MAPK11	8.25486	0	1.07897	0
MRAS	8.25486	111.333	52.222	6.10404
CDC42	7.17814	61.1548	40.3534	9.98842
FOXO3	7.17814	7.84036	0.431587	6.10404
SMAD7	4.66579	45.9968	1.07897	2.77456
NRAS	3.94798	0	18.3425	48.8323
FOXC2	3.58907	2.09076	0	1.66474
ACVR2A	2.51235	0	17.6951	1.66474
BMP8A	2.51235	0	0	0
TGFBR1	2.51235	120.742	93.007	12.2081
GDF1	2.15344	0.522691	0	0
DCP1B	1.79454	0.522691	9.06333	37.734
TLL2	1.79454	1.04538	46.6114	0
ACVR1B	1.43563	0	33.0164	0
BMP4	1.43563	0.522691	1.07897	147.052
MAPK14	1.43563	1.04538	23.0899	22.7514
ZFYVE16	1.43563	0	2.37373	0
BMP3	1.07672	0	0	0
BMP6	1.07672	7.84036	27.4058	17.2023
MAPK10	1.07672	1.04538	3.2369	120.971
FOXH1	0.717814	3.13614	1.07897	21.0867
FOXJ1	0.717814	12.0219	0.431587	1.10982
FOXM1	0.717814	0.522691	27.19	1.10982
GDF11	0.717814	1.04538	30.8585	21.0867
SMAD6	0.717814	0	0	0
BMP7	0.358907	0	0.431587	59.9305
BMPR1A	0.358907	0	0.647381	1.66474
FKBP1B	0.358907	0	4.10008	2.77456
FOXN3	0.358907	0.522691	2.37373	19.9768
GDF5	0.358907	1.04538	36.9007	0
LEFTY2	0.358907	0	26.7584	0.554912
RAB28	0.358907	27.1799	1.07897	1.10982
RRAS2	0.358907	0	11.2213	3.88439
ACVR1C	0	0	0	0
ACVR2B	0	0	0	0
ACVRL1	0	0	0.215794	2.77456
AMHR2	0	0	0	0
ATF2	0	0	0	0
BMP10	0	0	0	0
BMP15	0	0	0	0
BMP2	0	0	0	0
BMP5	0	0	0	0
BMP8B	0	0	0	0
BMPR1B	0	0	0	0
CITED1	0	0	0	0
CITED2	0	3.65884	0	1.10982
EP300	0	0	0	1.10982
FOXA1	0	0	0	28.3005
FOXA2	0	0	0	0
FOXA3	0	0	0	0
FOXB1	0	0	0	0
FOXB2	0	0	0	0
FOXD1	0	0	0	0
FOXD2	0	0	0	0
FOXD3	0	0	0	0
FOXD4	0	0.522691	0	0
FOXD4L1	0	0	0	0
FOXD4L5	0	0	0	0
FOXD4L6	0	0	0	0
FOXE1	0	0	0	0
FOXE3	0	0	0	0
FOXF1	0	0	0.215794	0
FOXF2	0	0	0	0
FOXG1	0	0	0	0
FOXI1	0	0	0	0
FOXI2	0	0	0	0
FOXK1	0	11.4992	4.74746	1.10982
FOXL1	0	0	0	0
FOXL2	0	0	0	0
FOXN1	0	0	0	0
FOXN2	0	0	3.02111	0
FOXN4	0	0	0	0
FOXO4	0	0	0.215794	0
FOXP1	0	1.56807	0	0
FOXP2	0	0	0	0
FOXP3	0	0	0.215794	0
FOXQ1	0	0	0.647381	40.5086
FOXR1	0	0	0	0
FOXR2	0	0	0	0
FOXS1	0	0	0	0
GDF10	0	0	0	0
GDF2	0	0	0	0
GDF3	0	0	0	0
GDF6	0	0	0	0
GDF7	0	0	0	0
GDF9	0	0	0	0
GDNF	0	0	0.431587	0
INHBA	0	0	27.19	0
INHBB	0	0	0	0
INHBC	0	0	0	0
INHBE	0	0	0	0
LEFTY1	0	0	0	0
MAPK12	0	0.522691	16.8319	0
MAPK13	0	0	0.431587	54.9363
MAPK8	0	0	1.51055	0
MSTN	0	0	0	0
NODAL	0	0	0	0
RHEBL1	0	0	0	0
RIT2	0	0	0	0
SKI	0	1.04538	6.25801	0.554912
SKIL	0	0	0	0
SMAD1	0	4.70422	0	0
TGFB1	0	0	0	5.54912
TGFB2	0	6.27229	22.4425	1.10982
TGFBRAP1	0	0	2.37373	0
TLL1	0	0	0	0
